# Supplementary material
Source: Springer Nature journal article supplement (https://www.springermedizin.de/resource/supplementary/13054_2010_8817_MOESM1_ESM.pdf/9732644)
Supplement: MOESM1 [file 9732644]

242 patients with severe sepsis

157 patients with community-acquired severe sepsis

85 patients with nosocomial severe sepsis

PCT day 0  
<0.5 ng/ml

17 patients

PCT day 0  
≥0.5 ng/ml

140 patients

PCT day 0  
<0.5 ng/ml

19 patients

PCT day 0  
≥0.5 ng/ml

66 patients

Hospital  
mortality  
23.5%  
(4/17)

Hospital  
mortality  
24.3%  
(34/140)

Hospital  
mortality  
21.1%  
(4/19)

Hospital  
mortality  
30.3%  
(20/66)
